# Supplementary material
Source: HighWire-hosted journal article supplement (https://erj.ersjournals.com/content/54/6/1902271)
Supplement: inline-supplementary-material-1 [file inline-supplementary-material-1.pdf]

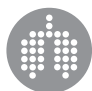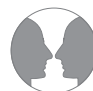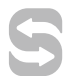

SHAREABLE PDF

# Tracheomalacia and bronchomalacia in children: response to the ERS statement

Colin Wallis<sup>1</sup>, Kostas Priftis<sup>2</sup>, Anne Chang<sup>3,4,5</sup>, Fabio Midulla<sup>6</sup> and Jayesh Bhatt<sup>7</sup> 

**Affiliations:** <sup>1</sup>Respiratory Medicine Unit, Great Ormond Street Hospital for Children, London, UK. <sup>2</sup>Dipartimento Salute della Donna e del Bambino, Università degli Studi di Padova, Padova, Italy. <sup>3</sup>Dept of Respiratory and Sleep Medicine, Queensland Children's Hospital, Brisbane, Australia. <sup>4</sup>Centre for Children's Health Research, Institute of Health and Biomedical Innovation, Queensland University of Technology, Brisbane, Australia. <sup>5</sup>Child Health Division, Menzies School of Health Research, Charles Darwin University, Casuarina, Australia. <sup>6</sup>Dept of Paediatrics, "Sapienza" University of Rome, Rome, Italy. <sup>7</sup>Nottingham University Hospitals NHS Trust, Queen's Medical Centre, Nottingham, UK.

**Correspondence:** Colin Wallis, Respiratory Medicine Unit, Great Ormond Street Hospital for Children, Great Ormond Street, London, WC1N 3JH, UK. E-mail: colin.wallis@gosh.nhs.uk

 @ERSpublications

**A working definition for tracheobronchomalacia in children is provided in the task force document published by the ERS in 2019. This may require review in due course as further research into the dynamic aspects of malacia and clinical correlation emerges.** <http://bit.ly/2rNuq08>

**Cite this article as:** Wallis C, Priftis K, Chang A, *et al.* Tracheomalacia and bronchomalacia in children: response to the ERS statement. *Eur Respir J* 2019; 54: 1902271 [<https://doi.org/10.1183/13993003.02271-2019>].

This single-page version can be shared freely online.

## *From the authors:*

We thank S. Crowley and K-H. Carlsen for their interest in the European Respiratory Society task force document on tracheomalacia and bronchomalacia (TBM) in children [1].
